# Supplementary material for: The Geriatric Nutritional Risk Index Predicts Prognosis in Japanese Patients with LATITUDE High-Risk Metastatic Hormone-Sensitive Prostate Cancer: A Multi-Center Study
Source: MDPI journal article supplement (doi:10.3390/cancers15225333), 2023-11-08
Supplement: s1 [file s1]

# Supplementary Materials: The Geriatric Nutritional Risk Index Predicts Prognosis in Japanese Patients with LATITUDE High-Risk Metastatic Hormone-Sensitive Prostate Cancer: A Multi-Center Study

Taku Naiki, Kiyoshi Takahara, Hiromitsu Watanabe, Keita Nakane, Yosuke Sugiyama, Takuya Koie, Ryoichi Shiroki, Hideaki Miyake and Takahiro Yasui

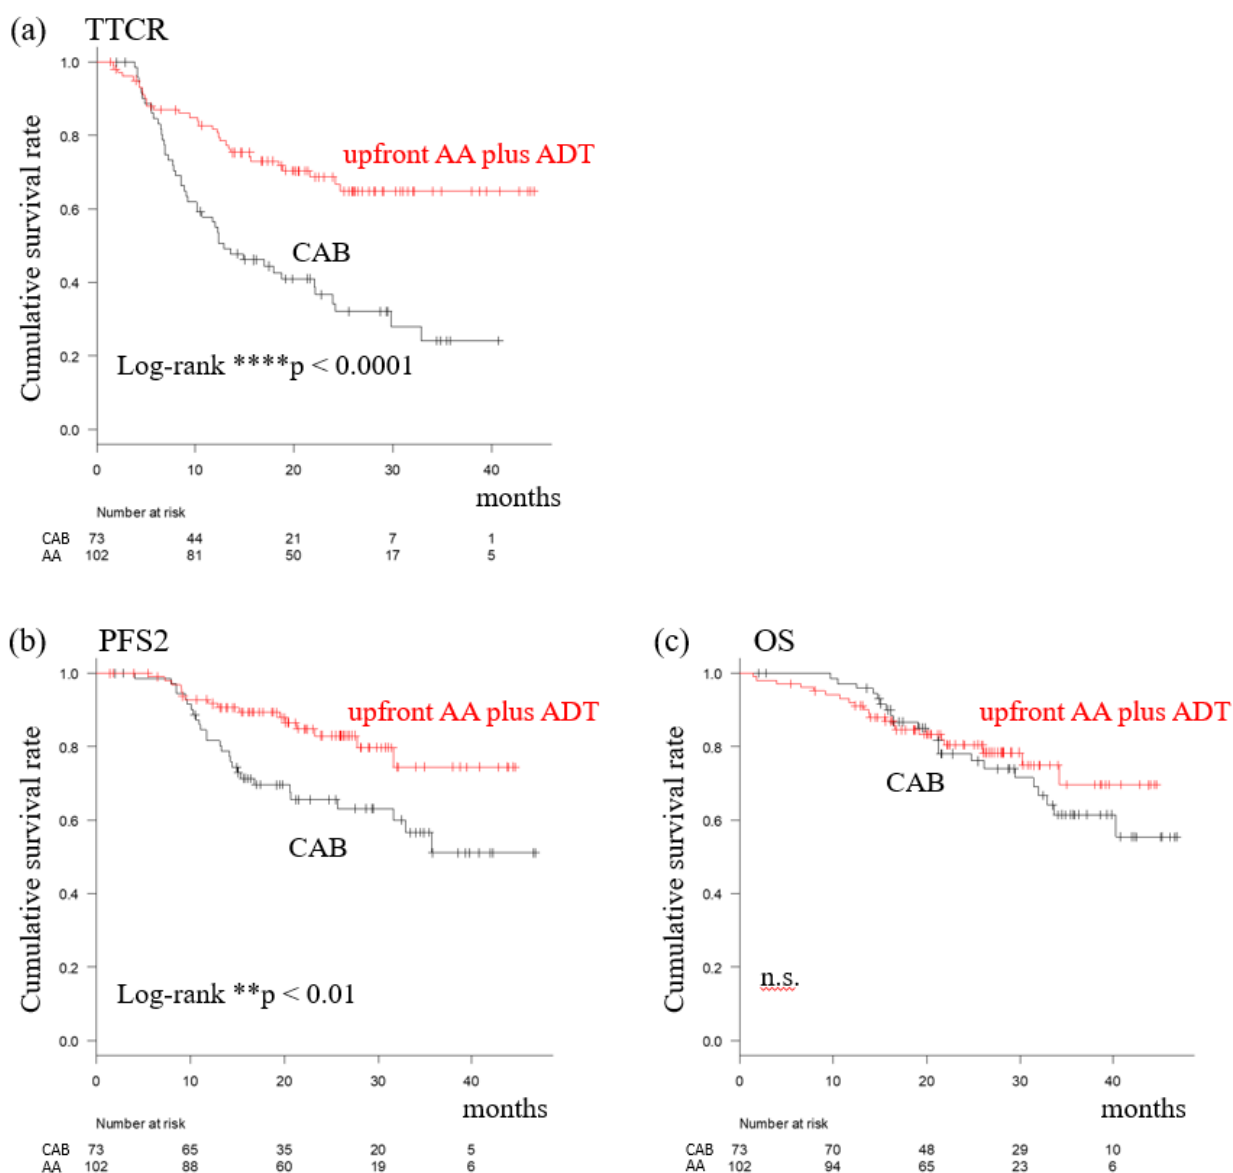

Figure S1. TTCR (a), PFS 2.

**Table S1.** Patients' characteristics and oncological outcomes for CAB and upfront AA plus ADT groups.

| Characteristics                                |      | CAB group (n=73)    | Upfront AA plus ADT group (n=102) | p value    |
|------------------------------------------------|------|---------------------|-----------------------------------|------------|
| Median age, years (range)                      |      | 76<br>(58–91)       | 74<br>(48–87)                     | 0.16       |
| Median initial serum PSA levels, ng/ml (range) |      | 227<br>(3.5–1000)   | 265<br>(0.8–16720)                | 0.15       |
| Median BMI, kg/m <sup>2</sup> (range)          |      | 22.7<br>(16.3–34.1) | 22.6<br>(14.2–31.6)               | 0.31       |
| Gleason score at initial diagnosis, n (%)      | 4+3  | 1 (1.4)             | 1 (1.0)                           | 0.15       |
|                                                | 4+4  | 35 (47.9)           | 32 (31.4)                         |            |
|                                                | 4+5  | 21 (28.8)           | 36 (35.3)                         |            |
|                                                | 5+4  | 12 (16.4)           | 20 (19.6)                         |            |
|                                                | 5+5  | 4 (5.5)             | 13 (12.7)                         |            |
| Clinical T stage                               | 2a   | 0 (0)               | 4 (3.9)                           | 0.36       |
|                                                | 2b   | 5 (6.8)             | 3 (2.9)                           |            |
|                                                | 2c   | 5 (6.8)             | 11 (10.8)                         |            |
|                                                | 3a   | 15 (20.5)           | 25 (24.5)                         |            |
|                                                | 3b   | 25 (34.2)           | 29 (28.4)                         |            |
|                                                | 4    | 23 (31.5)           | 30 (29.4)                         |            |
| Clinical N stage                               | N0   | 40 (54.8)           | 47 (46.1)                         | 0.53       |
|                                                | N1   | 32 (43.8)           | 52 (51.0)                         |            |
|                                                | N2   | 1 (1.4)             | 3 (2.9)                           |            |
| Visceral metastasis, n (%)                     | no   | 52 (71.2)           | 65 (63.7)                         | 0.33       |
|                                                | yes  | 21 (28.8)           | 37 (36.3)                         |            |
| ECOG–PS, n (%)                                 | 0    | 50 (68.5)           | 77 (75.5)                         | 0.31       |
|                                                | 1    | 17 (23.3)           | 13 (12.7)                         |            |
|                                                | 2    | 5 (6.8)             | 10 (9.8)                          |            |
|                                                | 3    | 1 (1.4)             | 2 (2.0)                           |            |
| Existence of symptom, n (%)                    |      | 42 (57.5)           | 60 (58.8)                         | 0.89       |
| The use of bone modifying agents, n (%)        |      | 38 (52.1)           | 64 (62.7)                         | 0.17       |
| Median serum albumin level, g/dl (range)       |      | 3.9<br>(1.5–6.6)    | 3.9<br>(2.2–4.8)                  | 0.76       |
| Median serum ALP level, U/l (range)            |      | 372<br>(81–8300)    | 446<br>(139–11620)                | 0.55       |
| GNRI level                                     | low  | 14 (19.2)           | 22 (21.6)                         | 0.85       |
|                                                | high | 59 (80.8)           | 80 (78.4)                         |            |
| 50% decline in PSA, n (%)                      |      | 61 (83.6)           | 88 (86.3)                         | 0.67       |
| Median period to PSA nadir, days (range)       |      | 201<br>(37–980)     | 298<br>(21–1215)                  | 0.13       |
| CRPC development, n (%)                        |      | 47 (64.4)           | 31 (30.4)                         | < 0.001*** |

AA: Abiraterone acetate, ADT: Androgen deprivation therapy, ALP: Alkaline phosphatase, Bica: bicalutamide, BMI: Body mass index, CAB: Combined androgen blockade, CRPC: Castration-resistant prostate cancer, ECOG–PS: Eastern Cooperative Oncology Group performance status, GNRI: Geriatric nutritional index, PSA: Prostate specific antigen.
